# Supplementary material for: Effects of Intra-BLA Administration of PPAR Antagonists on Formalin-Evoked Nociceptive Behaviour, Fear-Conditioned Analgesia, and Conditioned Fear in the Presence or Absence of Nociceptive Tone in Rats
Source: MDPI journal article supplement (doi:10.3390/molecules27062021), 2022-03-21
Supplement: s1 [file s1]

Supplementary Materials

# Effects of Intra-BLA Administration of PPAR Antagonists on Formalin-Evoked Nociceptive Behaviour, Fear-Conditioned Analgesia, and Conditioned Fear in the Presence or Absence of Nociceptive Tone in Rats

Jessica C. Gaspar <sup>1,2,3</sup>, Bright N. Okine <sup>1,2,3</sup>, David Dinneen <sup>1,3,4</sup>, Michelle Roche <sup>2,3,4</sup> and David P. Finn <sup>1,2,3,5,\*</sup>

<sup>1</sup> Pharmacology and Therapeutics, National University of Ireland Galway, Galway, Ireland; H91 W5P7 jeccgaspar@gmail.com (J.C.G.); bnokine@gmail.com (B.N.O.); ddinneen01@qub.ac.uk (D.D.)

<sup>2</sup> Galway Neuroscience Centre, National University of Ireland Galway, Galway, Ireland; michelle.roche@nuigalway.ie

<sup>3</sup> Centre for Pain Research, National University of Ireland Galway, Galway, Ireland

<sup>4</sup> Physiology, National University of Ireland Galway, Galway, Ireland

<sup>5</sup> Pharmacology and Therapeutics, Human Biology Building, National University of Ireland Galway, University Road, Galway, Ireland

\* Correspondence: david.finn@nuigalway.ie; Tel.: +353-(0)91-495280

**Supplementary Table S1.** Summary of experimental groups. NFC, non-fear conditioned; FC, fear conditioned.

| Experiments  | Intraplantar injection | Treatment                                | Conditioning      |                  |
|--------------|------------------------|------------------------------------------|-------------------|------------------|
|              |                        |                                          | NFC (n per group) | FC (n per group) |
| Experiment 1 | Formalin               | Vehicle                                  | 11                | 11               |
|              | Formalin               | GW6471 (PPAR $\alpha$ antagonist)        | 11                | 11               |
|              | Formalin               | GSK0660 (PPAR $\beta/\delta$ antagonist) | 11                | 11               |
|              | Formalin               | GW9662 (PPAR $\gamma$ antagonist)        | 11                | 11               |
| Experiment 2 | Saline                 | Vehicle                                  | 11                | 11               |
|              | Saline                 | GW6471 (PPAR $\alpha$ antagonist)        | 11                | 11               |
|              | Saline                 | GSK0660 (PPAR $\beta/\delta$ antagonist) | 11                | 11               |
|              | Saline                 | GW9662 (PPAR $\gamma$ antagonist)        | 11                | 11               |

**Supplementary Table S2.** Master mixture 1 for cDNA synthesis.

| Reagents               | Per Sample                |
|------------------------|---------------------------|
| Random Primers (250ng) | 1 $\mu$ l                 |
| 10mm dNTP mix          | 1 $\mu$ l                 |
| <b>Total</b>           | <b>2<math>\mu</math>l</b> |

**Supplementary Table S3.** Master mixture 2 for cDNA synthesis.

| Reagents               | Per Sample                |
|------------------------|---------------------------|
| 5X First Strand Buffer | 4 $\mu$ l                 |
| 0.1M DTT               | 2 $\mu$ l                 |
| RNase Out              | 1 $\mu$ l                 |
| <b>Total</b>           | <b>7<math>\mu</math>l</b> |

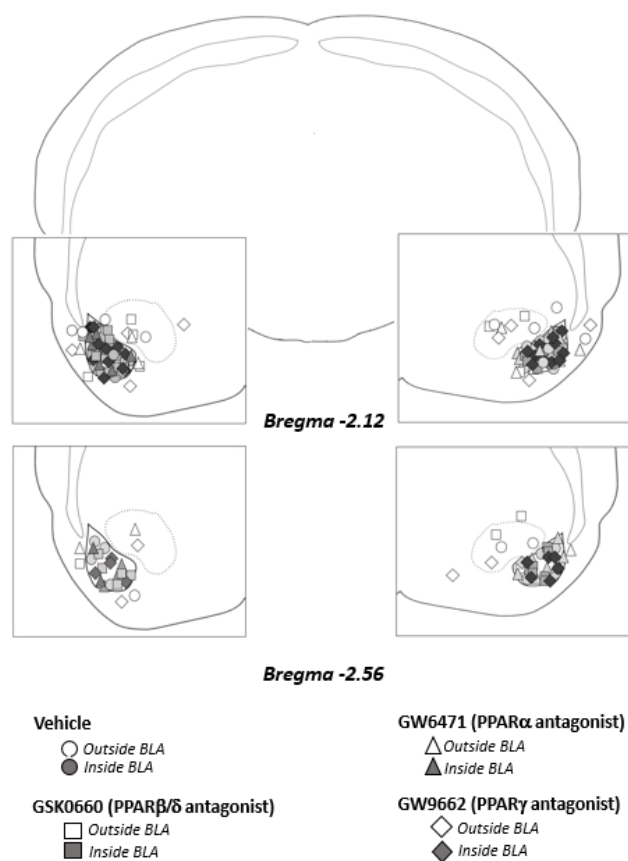

Supplementary Figure S1. Histological verification of injector site location for experiment 1.

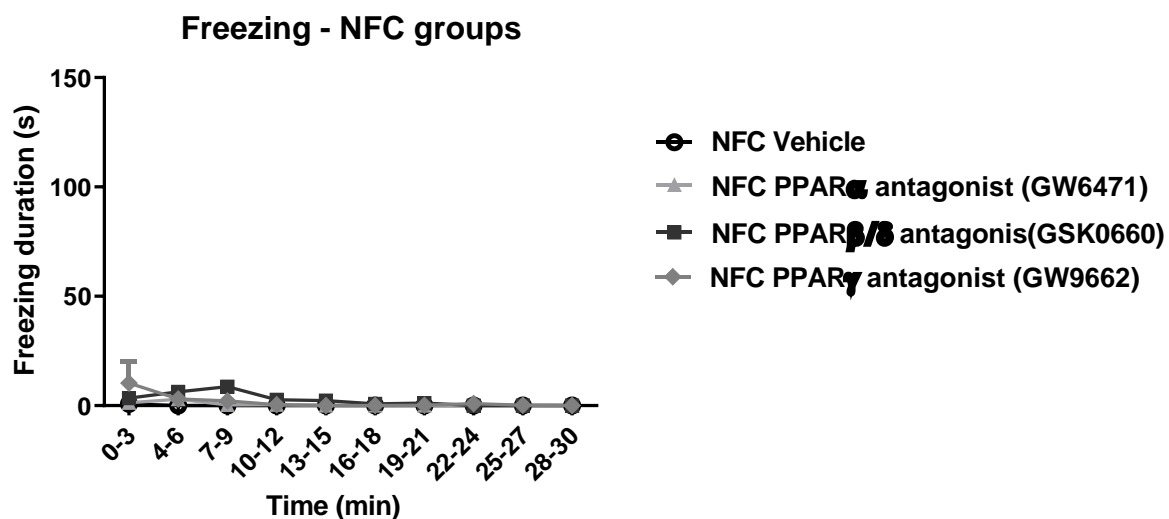

Supplementary Figure S2. Effects of intra-BLA administration of selective PPAR $\alpha$ , PPAR $\beta/\delta$  and PPAR $\gamma$  antagonists on freezing duration presented as 3-min time bins (B) in non-fear conditioned (NFC) rats.

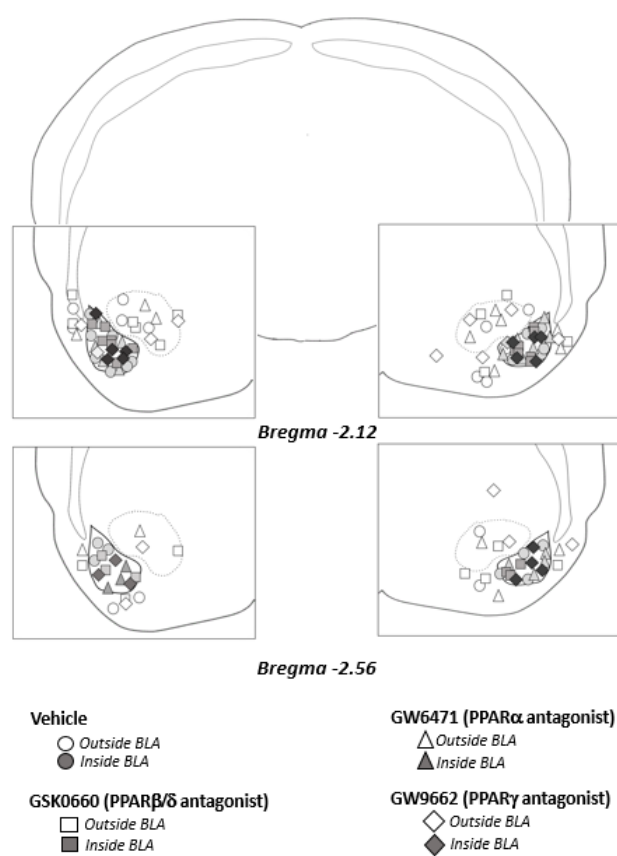

**Supplementary Figure S3.** Histological verification of injector site location for experiment 2.

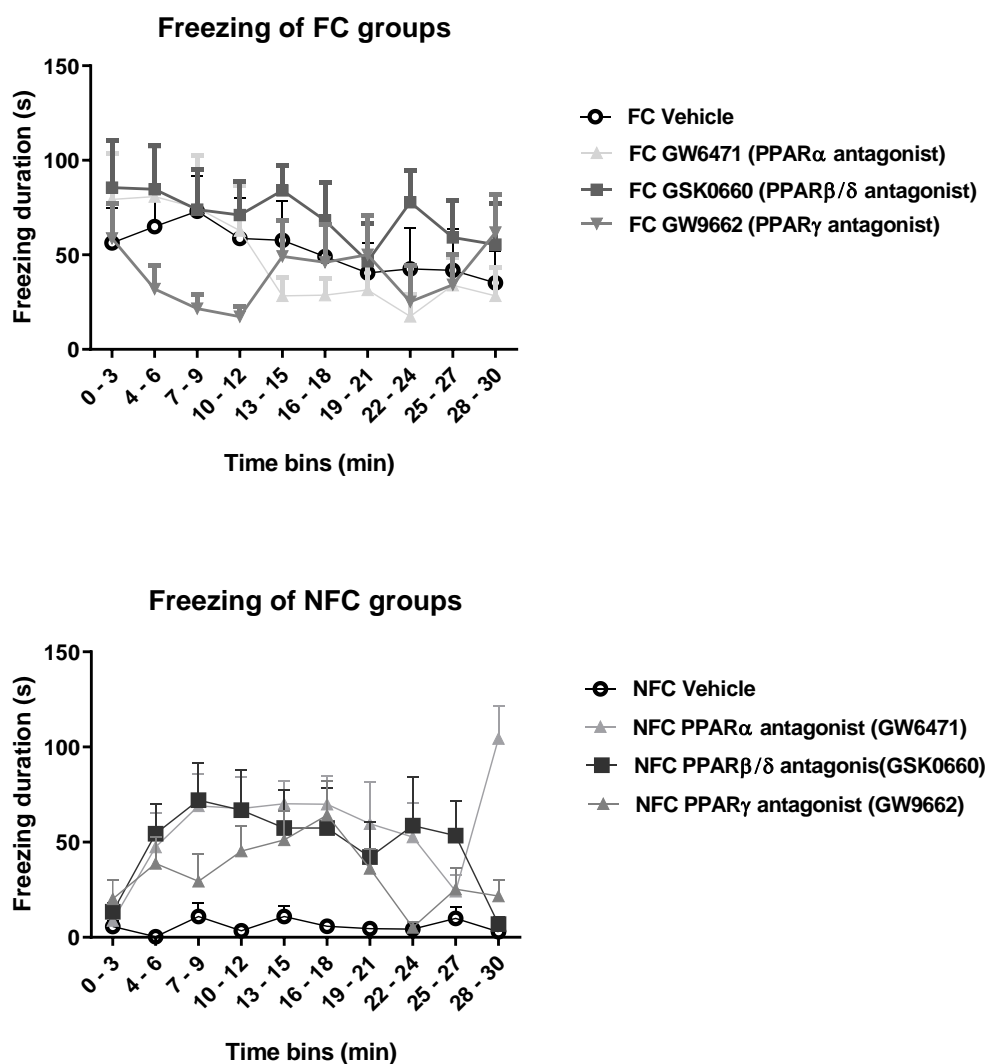

**Supplementary Figure S4.** Effects of intra-BLA administration of selective PPAR $\alpha$ , PPAR $\beta/\delta$  and PPAR $\gamma$  antagonists on freezing duration presented as 3-min time bins in fear conditioned (FC) or non-fear conditioned (NFC) rats.

#### Annex S1 – Description of statistical results for section 2.4.1

Three-way ANOVA revealed a significant main effect of side [ $F(1, 52) = 10.730$ ,  $p = 0.002$ ] on GABA levels in the BLA (Figure 17A). *Post hoc* pairwise analysis with Student Newman-Keuls did not show any significant statistical differences. There were no significant effects of fear conditioning, treatment [ $F(1, 52) = 2.446$ ,  $p > 0.05$ ], treatment  $\times$  conditioning [ $F(1, 52) = 2.030$ ,  $p > 0.05$ ], treatment  $\times$  side [ $F(1, 52) = 0.022$ ,  $p > 0.05$ ], conditioning  $\times$  side [ $F(1, 52) = 0.556$ ,  $p > 0.05$ ], treatment  $\times$  conditioning  $\times$  side [ $F(1, 52) = 3.365$ ,  $p > 0.05$ ] on GABA levels. When the right and left sides were analysed separately, two-way ANOVA did not show any significant effect of treatment, conditioning or their interaction on GABA levels in either left or right BLA.

Three-way ANOVA revealed an effect of side [ $F(1, 52) = 5.630$ ,  $p = 0.021$ ] on glutamate levels in the BLA (Figure 17B). *Post hoc* pairwise analysis with Student-Newman-Keuls did not show any significant statistical differences. There were no significant effects of fear conditioning [ $F(1, 52) = 0.103$ ,  $p > 0.05$ ], treatment [ $F(1, 52) = 0.865$ ,  $p > 0.05$ ], treatment  $\times$  conditioning [ $F(1, 52) = 1.429$ ,  $p > 0.05$ ], treatment  $\times$  side [ $F(1, 52) = 0.637$ ,  $p > 0.05$ ], conditioning  $\times$  side [ $F(1, 52) = 0.007$ ,  $p > 0.05$ ], treatment  $\times$  conditioning  $\times$  side [ $F(1, 52) = 1.133$ ,

$p > 0.05$ ] on glutamate levels. When the contra and left sides were analysed separately, two-way ANOVA did not show any significant effect of treatment, conditioning or their interaction on glutamate in either left or right BLA.

Three-way ANOVA revealed an effect of side [ $F(1, 51) = 12.192$ ,  $^a p = 0.001$ ] and fear conditioning [ $F(1, 51) = 5.238$ ,  $p = 0.026$ ] on serotonin levels in the BLA (Figure 17C). *Post hoc* pairwise analysis with Student Newman-Keuls indicated that saline-treated FC rats have increased levels of serotonin compared to their NFC counterparts (NFC Saline-treated vs FC Saline-treated,  $^b p < 0.05$ ) on the right side. There were no significant effects of treatment [ $F(1, 51) = 0.029$ ,  $p > 0.05$ ], treatment  $\times$  conditioning [ $F(1, 51) = 1.564$ ,  $p > 0.05$ ], treatment  $\times$  side [ $F(1, 51) = 1.644$ ,  $p > 0.05$ ], conditioning  $\times$  side [ $F(1, 51) = 2.044$ ,  $p > 0.05$ ], treatment  $\times$  conditioning  $\times$  side [ $F(1, 51) = 3.796$ ,  $p > 0.05$ ] on serotonin levels. When right and left sides were analysed separately, two-way ANOVA revealed significant effect of fear conditioning [ $F(1, 24) = 4.464$ ,  $^c p < 0.05$ ] on serotonin levels in the right BLA. However, *post hoc* pairwise analysis with Student Newman-Keuls did not show significant statistical differences. Two-way ANOVA showed that there were no significant effects of treatment, conditioning and their interaction on serotonin levels in the left BLA.

Three-way ANOVA revealed an effect of side [ $F(1, 47) = 53.882$ ,  $^a p < 0.001$ ] and treatment [ $F(1, 47) = 14.541$ ,  $p < 0.001$ ] on dopamine levels in the BLA (Figure 17D). *Post hoc* pairwise analysis with Student Newman-Keuls confirmed the side differences ( $^* p < 0.05$ , compared to their left counterparts) and indicated that NFC rats which received an intra-plantar injection of formalin have increased levels of dopamine on the right BLA (NFC Saline-treated vs NFC-Formalin-treated,  $^b p < 0.05$ ). There were no significant effects of fear conditioning [ $F(1, 47) = 0.002$ ,  $p > 0.05$ ], treatment  $\times$  conditioning [ $F(1, 47) = 0.055$ ,  $p > 0.05$ ], treatment  $\times$  side [ $F(1, 47) = 2.115$ ,  $p > 0.05$ ], conditioning  $\times$  side [ $F(1, 47) = 0.477$ ,  $p > 0.05$ ], treatment  $\times$  conditioning  $\times$  side [ $F(1, 47) = 1.358$ ,  $p > 0.05$ ] on dopamine levels. When the right and left sides were analysed separately, two-way ANOVA did not show any significant effect of treatment, conditioning or their interaction on dopamine levels in either left or right BLA.

## Annex S2 – Description of statistical results for section 2.4.2

Three-way ANOVA revealed an effect of side [ $F(1, 49) = 4.191$ ,  $^a p = 0.046$ ] on PEA levels in the BLA (Fig. 18A). *Post hoc* pairwise analysis with Student Newman-Keuls did not show significant statistical differences. There were no significant effects of fear conditioning [ $F(1, 49) = 3.237$ ,  $p > 0.05$ ], treatment [ $F(1, 49) = 3.912$ ,  $p > 0.05$ ], treatment  $\times$  conditioning [ $F(1, 49) = 0.035$ ,  $p > 0.05$ ], treatment  $\times$  side [ $F(1, 49) = 3.758$ ,  $p > 0.05$ ], conditioning  $\times$  side [ $F(1, 49) = 0.856$ ,  $p > 0.05$ ], treatment  $\times$  conditioning  $\times$  side [ $F(1, 49) = 1.275$ ,  $p > 0.05$ ] on PEA levels. When right and left sides were analysed separately, two-way ANOVA revealed significant effect of treatment [ $F(1, 23) = 8.216$ ,  $p = 0.009$ ] on PEA levels in the right BLA. *Post hoc* pairwise analysis with Student-Newman-Keuls indicated that FC rats that received formalin injection had lower levels of PEA in the right side compared to their saline-treated counterparts (FC Formalin-treated vs FC Saline-treated,  $^b p < 0.05$ ). Two-way ANOVA showed that there were no significant effects of treatment, conditioning or their interaction on PEA levels in the left BLA.

Kruskal-Wallis comparisons revealed a significant difference among groups ( $\chi^2(7) = 35.131$ ,  $p < 0.05$ ) in AEA levels (Figure 18B). *Post hoc* analysis with Dunn's test showed lower levels of AEA of NFC Saline group in the right side compared to the left ( $^* p < 0.05$ ). When each side was analysed separately, Kruskal Wallis did not reveal any significant differences among group in the right [ $\chi^2(3) = 6.485$ ,  $p > 0.05$ ] or in the left [ $\chi^2(3) = 2.456$ ,  $p > 0.05$ ] side.

Three-way ANOVA revealed an effect of side [ $F(1, 48) = 9.699$ ,  $^a p = 0.003$ ] on OEA levels in the BLA (Fig. 18C). *Post hoc* pairwise analysis with Student Newman-Keuls did not show significant statistical differences. There were no significant effects of fear conditioning [ $F(1, 48) = 3.013$ ,  $p > 0.05$ ], treatment [ $F(1, 48) = 0.346$ ,  $p > 0.05$ ], treatment  $\times$  conditioning [ $F(1, 48) = 0.087$ ,  $p > 0.05$ ], treatment  $\times$  side [ $F(1, 48) = 2.259$ ,  $p > 0.05$ ], conditioning

x side [ $F(1, 48) = 0.308$ ,  $p > 0.05$ ], treatment x conditioning x side [ $F(1, 48) = 1.667$ ,  $p > 0.05$ ] on OEA levels. When the right and left sides were analysed separately, two-way ANOVA showed that there were no significant effects of treatment, conditioning or their interaction on OEA levels in either the left or right BLA.
